# A long noncoding RNA, *LOC157273*, is the effector transcript at the chromosome 8p23.1-*PPP1R3B* metabolic traits and type 2 diabetes risk locus

Alisa K. Manning<sup>1,2,3\*</sup>, Anton Scott Goustin<sup>4\*</sup>, Erica L. Kleinbrink<sup>4\*</sup>, Pattaraporn Thepsuwan<sup>4</sup>, Juan Cai<sup>4</sup>, Donghong Ju<sup>4,5</sup>, Aaron Leong<sup>3,6,7</sup>, Miriam S. Udler<sup>6,8</sup>, James Bentley Brown<sup>9,10</sup>, Mark O. Goodarzi<sup>11</sup>, Jerome I. Rotter<sup>12</sup>, Robert Sladek<sup>13,14,15</sup>, James B. Meigs<sup>2,3,7</sup> and Leonard Lipovich<sup>4,16</sup>

## Institutions

1. Clinical and Translational Epidemiology Unit, Mongan Institute, Massachusetts General Hospital, Boston, MA, USA
  2. Department of Medicine, Harvard Medical School, Boston, MA, USA
  3. Programs in Metabolism and Medical & Population Genetics, Broad Institute of MIT and Harvard, Cambridge, MA, USA
  4. Center for Molecular Medicine & Genetics, Wayne State University, Detroit, MI, USA
  5. Karmanos Cancer Institute at Wayne State University, Detroit, MI, USA
  6. Center for Human Genetics Research, Massachusetts General Hospital, Boston, MA, USA
  7. Division of General Internal Medicine, Massachusetts General Hospital, Boston, MA, USA
  8. Diabetes Unit, Massachusetts General Hospital, Boston, MA, USA
  9. Department of Statistics, University of California, Berkeley, CA, USA
  10. Centre for Computational Biology, University of Birmingham, B15 2TT Birmingham, United Kingdom.
  11. Division of Endocrinology, Diabetes, and Metabolism, Department of Medicine, Cedars-Sinai Medical Center, Los Angeles, CA, USA
  12. The Institute for Translational Genomics and Population Sciences, Departments of Pediatrics and Medicine, Los Angeles Biomedical Research Institute at Harbor-UCLA Medical Center, Torrance, CA USA
  13. Department of Human Genetics, McGill University, Montréal, Québec, Canada.
  14. Department of Medicine, McGill University, Montréal, Québec, Canada
  15. McGill University and Genome Québec Innovation Centre, Montréal, Québec, Canada.
  16. Department of Neurology, School of Medicine, Wayne State University, Detroit, MI, USA
- \* Contributed equally

## Corresponding Authors:

Leonard Lipovich PhD  
Center for Molecular Medicine and Genetics  
Wayne State University  
3208 Scott Hall, 540 East Canfield Street  
Detroit MI 48201  
313 577 9683  
email: [LLipovich@med.wayne.edu](mailto:LLipovich@med.wayne.edu)  
ORCID ID: 0000-0002-0531-3570

James B Meigs MD MPH  
Division of General Internal Medicine  
Massachusetts General Hospital  
100 Cambridge St 16th Floor  
Boston MA 02114  
617 724 3203  
email: [jmeigs@partners.org](mailto:jmeigs@partners.org)  
ORCID ID : 0000-0002-2439-2657

- 1 **Word Count:** 4,416
- 2 **Tables:** 1; **Figures:** 5
- 3 **Keywords:** insulin resistances, hepatic glycogen storage, long non-coding RNA, metabolism, type 2
- 4 diabetes, regulatory mechanisms
- 5 **Running Title:** *LOC157273* is the effector transcript at *PPP1R3B* locus
- 6

7 **Abstract**

8  
9 **Aims:** Causal transcripts at genomic loci associated with type 2 diabetes are mostly unknown. The  
10 chr8p23.1 variant rs4841132, associated with an insulin resistant diabetes risk phenotype, lies in the  
11 second exon of a long non-coding RNA (lncRNA) gene, *LOC157273*, located 175 kilobases from  
12 *PPP1R3B*, which encodes a key protein regulating insulin-mediated hepatic glycogen storage in  
13 humans. We hypothesized that *LOC157273* regulates expression of *PPP1R3B* in human hepatocytes.

14  
15 **Methods:** We tested our hypothesis using Stellaris fluorescent in-situ hybridization to assess subcellular  
16 localization of *LOC157273*; siRNA knockdown of *LOC157273*, followed by RT-PCR to quantify  
17 *LOC157273* and *PPP1R3B* expression; RNA-seq to quantify the whole-transcriptome gene expression  
18 response to *LOC157273* knockdown and an insulin-stimulated assay to measure hepatocyte glycogen  
19 deposition before and after knockdown.

20  
21 **Results:** We found that siRNA knockdown decreased *LOC157273* transcript levels by approximately  
22 80%, increased *PPP1R3B* mRNA levels by 1.7-fold and increased glycogen deposition by >50% in  
23 primary human hepatocytes. An A/G heterozygous carrier (vs. three G/G carriers) had reduced  
24 *LOC157273* abundance due to reduced transcription of the A allele and increased *PPP1R3B* expression  
25 and glycogen deposition.

26  
27 **Conclusion:** We show that the lncRNA *LOC157273* is a negative regulator of *PPP1R3B* expression and  
28 glycogen deposition in human hepatocytes and the causal transcript at an insulin resistant type 2 diabetes  
29 risk locus.

30  
31  
32  
33

## 34 **Introduction**

35 Type 2 diabetes (T2D), a continually growing scourge worldwide, arises from the interaction of multiple  
36 factors with genetic susceptibility in insulin sensitivity and secretion pathways to increase risk (1-3).  
37 The search for genetic determinants of T2D and its risk factors has revealed over 400 common variants  
38 at over 250 coding and regulatory genomic loci that influence multiple distinct aspects of type 2 diabetes  
39 pathophysiology (4-8).

40  
41 In quantitative trait genome-wide association studies (GWAS) of non-diabetic individuals, we showed  
42 that the minor (rs4841132-A) allele at the chromosome 8p23.1 variant rs4841132  
43 (NR\_040039.1:n.548A>G; reference allele A has frequency ~11%) was significantly associated with an  
44 insulin resistance phenotype characterized by increased levels of fasting glucose (FG) and insulin (FI),  
45 elevated levels of triglycerides and an increased waist-hip ratio (4). This chromosome 8 locus is highly  
46 pleiotropic; and rs4841132 and nearby SNPs have been consistently associated with increased T2D risk  
47 as well as T2D-related metabolic phenotypes including glycemia in pregnancy, obesity, HDL:LDL ratio,  
48 total cholesterol, triglycerides, c-reactive protein levels, coronary artery disease, subclinical  
49 atherosclerosis, and fatty liver disease (4, 9-15).

50  
51 The variant rs4841132 resides ~175 kb from the nearest protein-coding gene, *PPP1R3B*. *PPP1R3B*  
52 encodes the glycogen-targeting subunit of PP1 protein phosphatase and is expressed most strongly in  
53 liver in both rodents and man; and at lower levels in skeletal muscle and other tissues (16-18). *PPP1R3B*  
54 connects ambient insulin to hepatic glycogen regulation: its overexpression in hepatocytes markedly  
55 increases both basal and insulin-stimulated glycogen synthesis (19). *PPP1R3B* has long been an  
56 attractive target for diabetes therapy, based on the concept of tipping ambient glycemic balance towards  
57 hepatic glycogen deposition (17, 20).

58  
59 We previously localized rs4841132 to exon 2 of a previously unannotated long non-coding RNA  
60 (lncRNA) gene, *LOC157273* (ENSG00000254235.1; NR\_040039.1) (21). In ancestry-specific analyses  
61 we identified a second variant rs9949 (chr8 distance 189084 kb;  $r^2_{YRI}$  with rs4841132, 0.18;  $r^2_{CEU}$ , 0.01)  
62 that resided in the second exon of *PPP1R3B* and was weakly associated with FI ( $P=6.9 \times 10^{-5}$ ) (21) and  
63 T2D (p-value  $5.9 \times 10^{-4}$ ) in African ancestry individuals. The lncRNA encoded at *LOC157273* is a  
64 plausible effector transcript for both variants, as lncRNAs are highly enriched at trait- and disease-  
65 associated loci, a few are now known to regulate metabolic pathways and disease risk, and many  
66 lncRNAs are *cis*-regulators, exerting both positive and negative regulation of neighboring protein-  
67 coding genes (22-28).

68  
69 These observations support a potential genetic regulatory relationship between *LOC157273* and  
70 *PPP1R3B* that could explain the observed metabolic trait and T2D risk GWAS associations at the  
71 chr8p23.1 locus (29, 30). As *PPP1R3B* is abundantly expressed in the human liver where it regulates  
72 glycogen storage, we studied cultured human hepatocytes to test the hypothesis that *LOC157273*  
73 regulates *PPP1R3B* expression, and consequently insulin-mediated glycogen deposition, and that  
74 *LOC157273* regulation of *PPP1R3B* varies by genotype at rs4841132.

## 76 **Methods**

### 77 *SNP Genotyping*

78 We obtained primary human hepatocytes from commercial sources and genotyped them by sequencing  
79 the region surrounding rs4841132 in a 2.9 kb *LOC157273* amplicon from purified DNA  
80 (**Supplementary Text**). We identified one rs4841132 A/G heterozygote out of 16 available hepatocyte  
81 donors (**Supplementary Table S1, Supplementary Figure S1**). This study was not considered human  
82 subjects research, as the research was performed using de-identified biospecimens from deceased

83 individuals that were commercially obtained from Lonza (formerly Triangle Research Labs) or  
84 ThermoFisher Scientific (formally LifeTech).

85  
86 *Cellular localization of LOC157273 with Stellaris RNA fluorescent in situ hybridization (FISH)*  
87 We used a custom-synthesized 48-probe set (LGC Biosearch Technologies; Petaluma, CA) of non-  
88 overlapping fluorescent-tagged oligonucleotides that tiled the 3.4 kb LOC157273 transcript. Probe  
89 nucleotide choices at all polymorphic sites were based on the NR\_040039.1 reference transcript, which  
90 contains the rs4841132-A (minor) allele. Fixed cells grown on collagen-coated glass coverslips were  
91 probed with the pooled probe set following the Biosearch Technologies Stellaris FISH protocol for  
92 adherent cells (<https://www.biosearchtech.com/support/resources/stellaris-protocols>). After mounting  
93 using Vectashield with DAPI, the hybridized coverslips were examined under an AxioObserver inverted  
94 fluorescence microscope (Carl Zeiss Microscopy) equipped with a 63×/1.40 oil objective lens. Red  
95 bodies in the merged images denote the Quasar 570 signal from the LOC157273 molecules; the blue-  
96 colored DAPI staining shows cell nuclei. Greater detail is provided in the Supplement.

97  
98 *TaqMan quantitative reverse-transcriptase PCR (qRT-PCR) to measure the expression levels of two*  
99 *isoforms of PPP1R3B mRNA and a single isoform of LOC157273 lncRNA*  
100 Oligo(dT) priming was used for reverse transcription of RNA into cDNA for all Taqman qRT-PCR  
101 analyses. Primers and probe-sets are described in more detail in the Supplement and Supplementary  
102 Table S2. The *LOC157273* amplicon spans intron 1 and includes 36 nt of exon 1 and 41 nt of exon 2.  
103 *PPP1R3B* transcription was assessed with two probe sets—one for the hepatocyte-specific mRNA, and  
104 one for the (more ubiquitous) mRNA. Three or four biological replicates were obtained for Taqman  
105 qRT-PCR in primary human hepatocyte donors TRL4079, Hu8200, TRL4056B, TRL4105A and  
106 TRL4108. All reactions were run as technical triplicates using the Applied Biosystems 7500 Fast Real-  
107 Time Instrument.

108  
109 *Small interfering (si) RNA knockdown of LOC157273*  
110 Small-interfering (si)RNA knockdown of *LOC157273* was performed on primary human hepatocytes  
111 from donor Hu8200 (genotype G/G at rs4841132) plated into collagen-coated 6-well plates  
112 (ThermoFisher Scientific #A11428-01). Cells were incubated in complete Williams' E medium and  
113 transfected with siRNA (50 nM; Dharmacon) and Lipofectamine® RNAiMAX reagent (ThermoFisher  
114 Scientific #13778075) in a final concentration of 1 mL/well Opti-MEM™. The target sequences in the  
115 3.4 kb *LOC157273* lncRNA (NR\_040039.1 or Ensembl ENST00000520390.1) were: siRNA09 in the  
116 3'-end of the third exon (GGGAAGGGTTAGAGAGGTC), siRNA11 in the first exon  
117 (CAACTTAGCTTCTCCATTTTT), siRNA13 near the 5'-end of the third exon  
118 (AGAGAAGGACTGAAGATCATT) and siRNA15 in the second exon  
119 (TCAGAGGACTTGACACCAT) where the sequences represent the sense-strand DNA targeted by the  
120 siRNAs. Six hours after transfection, 1 mL of complete medium (including 1X HepExtend) was pipetted  
121 into each well. On the next day, medium was removed after gentle up-and-down-pipetting (trituration) to  
122 dislodge dead cells and the transfected monolayer was supplemented first with 1 mL of complete  
123 Williams' E and then with ice-cold complete medium (including HepExtend) containing 1 mg/mL  
124 fibronectin (ThermoFisher Scientific Geltrex #A1413202), followed by gentle trituration to mix the  
125 fibronectin (final concentration becomes 0.5 mg/mL). Complete medium with HepExtend was changed  
126 daily in the evening (with gentle trituration) until 120 hr after initial plating. We performed pooled  
127 analysis of TaqMan qRT-PCR results from 3 biological replicates of the siRNA knockdown experiment  
128 after applying sequential corrections, including log transformation, mean centering, and autoscaling  
129 (54).

130  
131 *Transcriptome-wide effects of LOC157273 knockdown using RNA sequencing*

132 Transcriptome sequencing was performed by the Broad Institute's Sequencing Platform (31). Using the  
133 NCBI refGen database (hg19) and R/Bioconductor packages (GenomicFeatures, rsubread), we collapsed  
134 transcript annotations into genes and obtained gene counts using the pairedEnd option in featureCounts  
135 for all experimental treatment groups. Three biologic replicates were performed using primary human  
136 hepatocytes (Hu8200 donor) for 4 different siRNAs (siRNA09, siRNA11, siRNA13, siRNA15) and for  
137 control experiments consisting of either mock or scrambled siRNA transfection. Differentially expressed  
138 genes were obtained with DESeq2, with adjustment for batch effects and normalization for small gene  
139 counts in a model comparing gene counts in siRNA11 and siRNA15 experimental conditions to mock  
140 and scramble controls. We observed low counts which is standard when analyzing transcriptome-wide  
141 expression of protein-coding genes and lncRNAs even in the absence of siRNA knockdown. Therefore,  
142 we utilized shrinkage based on re-estimating the variance using dispersion estimates with a negative  
143 binomial distribution (32-34). We performed hierarchical clustering with normalized gene counts (after  
144 removing batch effects) and Reactome pathway-based analysis (both restricted to genes with  $P < 0.001$   
145 and effects as large as the *PPP1R3B* effect), and gene-set enrichment analysis (for all genes) with  
146 ReactomePA (35).

147

#### 148 *Glycogen Deposition Assay in response to insulin or glucagon*

149 We developed a protocol to measure glycogen content in cultured primary human hepatocytes using  
150 donor TRL4079 (heterozygote A/G at rs4841132) and donors TRL4055A, TRL4113 and TRL4012  
151 (homozygous G/G at rs4841132.) In the assay, adapted from Gómez-Lechón et al. (36), *Aspergillus*  
152 *niger* amyloglucosidase (Sigma-Aldrich #A7420) degrades cell-derived glycogen to glucose, which was  
153 measured in a fluorescent peroxide/peroxidase assay. Cells were lysed with ice-cold solubilization  
154 buffer (2% CHAPS, 150 mM NaCl, 25 mM Tris-HCl, pH 7.2) containing 1X HALT™ protease  
155 inhibitor cocktail (ThermoFisher 78430), using 400  $\mu$ L of lysis buffer for each well of a 6-well plate. To  
156 measure glucose polymerized as glycogen, the lysate was diluted 1:10 with sodium acetate buffer (50  
157 mM Na-acetate, pH 5.5) and treated with either 0.75-1.5 U amyloglucosidase (Sigma A7420) at pH 5.5  
158 (60 min at 37°C) or pH 5.5 buffer without enzyme. After incubation, 5  $\mu$ L aliquots of the  $\pm$  enzyme  
159 reactions were pipetted in triplicate (or more) into black 96-well plates (Corning #3603). Subsequently,  
160 45  $\mu$ L of a cocktail of glucose oxidase, horseradish peroxidase and AmplexRed (10 -acetyl-3,7-  
161 dihydroxyphenoxazine; from the components of Molecular Probes kit A22189) were added to the  
162 samples and maintained at room temperature in the dark until reading in the Synergy H1 instrument  
163 (Biotek) at 80% gain, fluorescence endpoint, excitation 530 nm, emission 590 nm. The fluorescence  
164 values from the negative controls were subtracted from experiment values to estimate the amount of  
165 glucose released from glycogen by amyloglucosidase.

166

167 Optimal establishment of primary human hepatocytes in tissue culture required a substratum of type 1  
168 collagen (24-well plates; ThermoFisher Scientific #A11428-02) and initial plating at 200,000 cells/well  
169 in complete Williams' E medium containing supraphysiological concentrations of insulin. This medium  
170 was essential for high-efficiency plating but precluded the study of insulin effect. We developed an  
171 insulin-free DMEM (IF-DMEM) supplemented with nicotinamide, zinc, copper, glutamine, transferrin,  
172 selenous acid and dexamethasone and no serum (37), which replaced the complete Williams' E from  
173 Day 2 onward (after washout of insulin from the adherent monolayers). After 24 h in IF-DMEM, we re-  
174 stimulated monolayers with 5000 pM insulin (fast-acting lispro insulin; Humalog from Lilly) for 24 hr  
175 and cellular glycogen content was assessed. Glucagon (GCG) treatment was for 15 or 30 min.  
176 Glucagon-mediated glycogenolysis was complete by 15 min with no change thereafter. Each glycogen  
177 assay included a glucose standard curve (0-5 nanomoles) as an absolute reference against which we  
178 gauged the fluorescence from Resorufin in insulin or glucagon-treated primary hepatocytes and used to  
179 estimate glycogen content in nM. We also assessed the effect of siRNA knockdown of *LOC157273* on  
180 glycogen storage in hepatocytes from donor Hu8200 using the same protocol. A generalized linear

181 model was used to estimate the mean effect of siRNA11 and siRNA15 on hepatocyte glycogen content  
182 in nM.

183

184 *Allelic imbalance of LOC157273 transcription in primary human hepatocytes*

185 *LOC157273* allelic imbalance was measured using RNA from primary human hepatocytes from a  
186 heterozygous (A/G) donor. We estimated allele-specific *LOC157273* transcription using gene-specific  
187 strand-specific (GSSS) reverse-transcription followed by PCR (**Supplementary Text**) and analysis on  
188 EtBr-stained agarose gels. cDNA priming was performed with a gene-specific primer (**Supplementary**  
189 **Table S3**) targeting a region of exon 3 common to major and minor alleles. The discrimination between  
190 major (rs4841132-G) and minor (rs4841132-A) alleles relies on the subsequent PCR step utilizing the  
191 reverse primers (32A, 32G, 33A or 33G) where the most 3'-base in the PCR primer is T (for 32A or  
192 33A) or C (for 32G or 33G)—the precise position of the SNP.

193

## 194 **Results**

195

196 *Bioinformatic evidence that LOC157273 is a candidate causal transcript*

197 Bioinformatic analysis showed the chr8p23.1 *PPP1R3B-LOC157273* locus to have the greatest amount  
198 of GWAS evidence for disease associations after intersection with all long non-coding RNA genes  
199 (**Supplementary Text, Supplementary Table S4**). The variant rs4841132 lies in a linkage  
200 disequilibrium (LD) region that spans *LOC157273* (**Supplementary Figure S2**) at a location  
201 corresponding to a promoter-like histone state in liver-derived cells (**Supplementary Table S5;**  
202 **Supplementary Text**). The strongest DNase I hypersensitive site lies at the conserved promoter of  
203 *LOC157273* (the gene appears to be conserved only between humans and non-human primates) and  
204 contains *CEBP* and *FOXA1* binding sites (**Supplementary Figure S3**). *LOC157273* is expressed almost  
205 exclusively in human hepatocytes (**Supplementary Figure S3**) (38). Notably, human *LOC157273*  
206 (hg19 and hg38) does not have any positional equivalents or putative orthologs in mouse (mm9 and  
207 mm10) detectable using our approaches (**Supplementary Figure S4A-B**) (39). Evident lack of  
208 conservation beyond primates is typical for human lncRNA genes (61, 62), and primate-specificity of  
209 functional lncRNAs such as *LOC157273* hints at limitations of mouse models.

210

211 *Small-interfering (si)RNA knockdown of LOC157273 reduces LOC157273 and increases PPP1R3B*  
212 *RNA levels and glycogen deposition in human hepatocytes*

213 Stellaris RNA FISH in rs4841132 G/G or A/G human hepatocytes showed that *LOC157273* is a  
214 cytoplasmic lncRNA, confined to small punctate (0.5 to 1.2 micron) bodies surrounding the nuclei  
215 (**Figure 1**). As cytoplasmic lncRNAs are amenable to siRNA-mediated knockdown, in G/G hepatocytes  
216 we performed transient transfection of four different siRNAs targeting exons 1, 2, and 3 of the  
217 *LOC157273* transcript (**Figure 2A**). The siRNAs siRNA-09 and siRNA-13 did not reproducibly reduce  
218 *LOC157273* transcript levels, but siRNA-11 and siRNA-15 reproducibly decreased *LOC157273*  
219 lncRNA by 72% (95% confidence interval (CI): 70-74%) and 75% (95% CI: 73-76%), respectively  
220 (**Figure 2B**). Knockdown with siRNA-11 and siRNA-15 increased the level of *PPP1R3B* mRNA by  
221 57% (95% CI: 54-61%) and 79% (95% CI: 70-89%), respectively (**Figure 2C**).

222

223 We investigated the effects of *LOC157273* knockdown on cell physiology by measuring glycogen  
224 production, which is directly affected by *PPP1R3B* levels. Averaged across three biological replicates  
225 (accounting for biological variability), *LOC157273* knockdown with siRNA-15 increased insulin-  
226 stimulated glycogen deposition by 13% (P=0.002), (**Figure 2D; Supplementary Figure S5**). Notably,  
227 siRNA-15 is the siRNA located closest to the variant rs4841132 in exon 2 of *LOC157273*. We also  
228 tested plasmid-based overexpression of *LOC157273* in human hepatocytes and hepatoma cells but did

229 not find alteration in levels of *PPP1R3B* expression (**Supplementary Text, Supplementary Figure**  
230 **S6**).

231

232 *As expected, LOC157273 knockdown has diverse transcriptome-wide effects*

233 We performed a gene expression differential expression analysis of human hepatocyte whole  
234 transcriptomes comparing siRNA-11 and siRNA-15 knockdown to control conditions. Of 15,441 unique  
235 genes tested, 953 genes showed nominal evidence for differential expression at  $P < 0.01$  (**Figure 3A,**  
236 **Supplementary Table S6**). RNA-seq results were consistent with Taqman RT-PCR results for both  
237 *LOC157273* (Fold Change = 0.75,  $P = 0.03$ ) and *PPP1R3B* (Fold Change = 1.34,  $P = 0.001$ ). To  
238 elucidate biological pathways which might be affected by these expression changes, we performed a  
239 Reactome pathway analysis with three sets of genes: the 953 genes with  $P < 0.01$  (**Supplementary Table**  
240 **S7A**), the 206 genes with Fold Change  $\leq 0.74$  and  $P_{\text{adj}} < 0.001$ , and the 222 genes with Fold-change  $\geq$   
241 1.34 and  $P_{\text{adj}} < 0.001$  (**Supplementary Figure S7; Supplementary Table S7B**). We observed two  
242 nominally significant Reactome pathways with the genes with Fold Change  $\leq 0.74$  and  $P_{\text{adj}} < 0.001$ :  
243 Glucuronidation and Biological Oxidations ( $P = 0.04$  for both pathways), and 17 enriched Reactome  
244 pathways with the genes with Fold Change  $\geq 1.34$  and  $P_{\text{adj}} < 0.001$  (**Figure 3B**). An unbiased gene-set  
245 enrichment analysis, using all gene results from the differential expression analysis, showed 164  
246 enriched pathways with  $P < 0.05$ , including fatty acid metabolism ( $P = 0.0004$ ), glucuronidation  
247 ( $P = 0.0007$ ), gluconeogenesis ( $P = 0.02$ ), and glucose metabolism ( $P = 0.03$ ) (**Supplementary Table S8**).  
248 Of the significantly enriched pathways, 23% fall under ‘Cell Cycle’ in the Reactome hierarchy, 16%  
249 under ‘Metabolism’ and 12% under ‘Signal Transduction.’

250

251 *Glycogen content and allelic imbalance of LOC157273 transcription in human hepatocytes*

252 Patterns of *LOC157273* expression and glycogen deposition in the rs4841132 A/G carrier were similar  
253 to those seen by siRNA knockdown of *LOC157273*:  $\Delta\text{CT}$  comparing *LOC157273* to *GAPDH* for G/G  
254 carriers averaged 8.94 (95% CI: 8.86-9.01), while the A/G carrier showed less *LOC157273* lncRNA  
255 ( $\Delta\text{CT}$ : 11.0 (95% CI: 9.4-12.6), an estimated 76% decrease in expression in A versus G allele carriers  
256 (**Table 1**). Before insulin stimulation, the median glycogen store in hepatocytes from the A/G  
257 heterozygote was 0.40 nM in a first replicate and 0.44 nM in a second replicate, compared to 0.12 nM in  
258 hepatocytes from a G/G homozygote (**Figure 4**). Median basal glycogen concentration in two other G/G  
259 donors were 0.14 nM and 0.06 nM (**Supplementary Figure S8**). In one assay, A/G hepatocytes had  
260 median glucose concentration of 0.53 nM after insulin re-stimulation, representing a 31% increase  
261 ( $P = 0.004$ ) in glycogen content over basal levels. In a replicate, glucose concentration was 0.59 nM after  
262 insulin re-stimulation, representing a consistent but non-significant increase of 33% ( $P = 0.06$ ). The  
263 hepatocytes from the G/G donor had no observable increase ( $P = 0.7$ ) in glycogen content over basal  
264 levels (**Figure 4**). To test whether the G or the A allele was responsible for the observed effects on  
265 *LOC157273* action, we used a single reverse primer in exon 3 (**Supplementary Table S3**) to prime  
266 cDNA synthesis enriched for *LOC157273* cDNA. In one assay, we observed 78% reduction of the  
267 rs4841132-A (minor) allele transcript compared to the G allele transcript. In a replicate, we observed  
268 88% reduction (**Figure 5**). These results suggest that the diminished content of *LOC157273* lncRNA in  
269 this A/G heterozygous hepatocyte donor results from a specific loss of lncRNA output in rs4841132-A  
270 (minor) allele carriers.

271

## 272 **Discussion**

273

274 Over fifteen years of genome-wide association discovery provides a rich abundance of loci and variants  
275 associated with T2D risk and its underlying metabolic pathophysiology. The genetic architecture of T2D  
276 is dominated by non-coding, regulatory, mostly common variation; with only ~7% of variants

277 convincingly shown to directly encode protein-altering mutations in Europeans (6, 8). The function of  
278 these hundreds of non-coding variants is being illuminated by integration of genomic association data  
279 with genomic functional information; for T2D, most data thus far come from islet chromatin regulatory  
280 mapping (40-42). Islet genomic regulatory features linked to GWAS signals include, for instance,  
281 enhancer site disruption (43), stretch enhancer potentiation (44), and lncRNA action in human (45) and  
282 mouse beta cell lines (25, 46).

283  
284 Liver, muscle and fat tissue also contribute to T2D pathophysiology, where progress is also being made  
285 to link human tissue-specific regulatory maps to GWAS signals (47, 48). In this report, we present  
286 evidence in human liver cells that the lncRNA *LOC157273* is the causal transcript at the GWAS-  
287 discovered chr8p23.1 “*PPP1R3B*” locus. We show that *LOC157273* is expressed exclusively in human  
288 hepatocytes, is a close (< 200 kb) genomic neighbor of an attractive T2D physiologic candidate gene,  
289 *PPP1R3B*, and is a negative regulator of *PPP1R3B* expression.

290  
291 We demonstrated that *LOC157273* is a predominantly cytoplasmic lncRNA. Any roles it may play in the  
292 cytoplasm remains uncertain. It is unknown whether a cytoplasmic mechanism exists whereby which  
293 *LOC157273* may regulate its neighbor gene *PPP1R3B* (presumably independent of genomic proximity).  
294 We also cannot discount an alternative role for *LOC157273* in genomic regulation, nor a potential role  
295 for *LOC157273* in dual control in both cytoplasmic and nuclear regulation of *PPP1R3B*.  
296 For instance, *LOC157273* might be subject to bidirectional nucleocytoplasmic shuttling with  
297 cytoplasmic excess, but still has a nuclear function in epigenetically downregulating its neighbor gene. If  
298 true, this would explain both the cytoplasmic foci (putative RNA-protein complexes allowing  
299 *LOC157273* to regulate numerous genes in-trans) and why its cytoplasmic knockdown rescues  
300 *PPP1R3B* expression (removal of excess *LOC157273* which cannot go back to the nucleus to regulate  
301 its neighbor gene in-cis).

302  
303 SiRNA knockdown of *LOC157273* nearly doubled *PPP1R3B* mRNA levels (versus control) and altered  
304 the expression of other human hepatocyte transcripts. This was accompanied by an increase of over  
305 >50% in insulin-mediated hepatocyte glycogen deposition, which is an expected functional consequence  
306 of increased *PPP1R3B* expression. As *PPP1R3B* is the principal known regulator of glucose entry into  
307 the hepatic glycogen deposition pathway, its negative regulation by *LOC157273* (containing rs4841132)  
308 strongly supports the lncRNA and not the protein *per se* as the causal transcript at the locus. Indeed,  
309 evidence for common genetic variation in *PPP1R3B* itself has been inconsistent for T2D risk in humans  
310 (21, 49), although rare variants in *PPP1R3B* are associated with human diabetes phenotypes (50, 51).

311  
312 Negative regulation of *PPP1R3B* by *LOC157273* provides partial evidence for the lncRNA to be the  
313 functional transcript at the chr8p23.1 locus. As the rs4841132-A allele occurs in about 1 in 10 people,  
314 we were able to find a single rs4841132 A/G heterozygote among all the commercial hepatocyte donors  
315 available to us. This A/G carrier had reduced *LOC157273* abundance, increased *PPP1R3B* expression  
316 and increased glycogen deposition vs. averages from three G/G carriers, mimicking the effect observed  
317 with knockdown in G/G hepatocytes. Although heterozygote data are from a single donor, they are  
318 concordant with other, independent data. In 125 liver biopsy samples from obese patients, the  
319 rs4841132-A allele (vs G) was associated with higher *PPP1R3B* mRNA levels, reduced *LOC157273*  
320 expression and protection against histologic hepatic steatosis (29). In another cohort of 1,539 individuals  
321 with non-viral liver disease, the rs4841132-A allele (vs G) was associated with increased hepatic x-ray  
322 attenuation reflecting increased glycogen deposition, consistent with a mild form of hepatic  
323 glycogenosis (30). Our data suggest that the rs4841132-A allele confers decreased transcriptional  
324 efficiency of *LOC157273*; reduced lncRNA abundance induces *PPP1R3B* upregulation as well as other  
325 transcripts apparently related to increased glycogen deposition. The large number of genes with



326 differential expression after *LOC157273* knockdown (221 upregulated and 206 downregulated) support  
327 a scenario of *LOC157273* as a master regulator of transcription in *trans*. Furthermore, several enriched  
328 pathways (fatty acid metabolism, PI3K/AKT signaling, among others) are concordant with enriched  
329 pathways from the transcriptome analysis of the 125 liver biopsy samples comparing carriers of the  
330 rs4841132-A allele vs non-carriers (29). Taken together, the functional data we present support the  
331 contention that the lncRNA *LOC157273* is the causal transcript at the chr8p23.1 GWAS locus,  
332 controlling T2D risk and metabolic physiology by hepatic regulation of *PPP1R3B* (and most likely  
333 other) transcription, thereby influencing variation in glycemia, other metabolic phenotypes, and T2D  
334 risk observed in genetic association studies.

335  
336 LncRNAs as a class have diverse molecular functions, and a few lncRNAs have emerged to be  
337 associated with cardiometabolic disease (52). *MIAT* (myocardial infarction associated transcript) was the  
338 first lncRNA identified by GWAS as a disease candidate gene (22). The chromosome 9p21 lncRNA  
339 *ANRIL* was subsequently shown to be associated with several forms of atherosclerosis; we now know  
340 that this molecule confers protection from atherosclerosis by controlling ribosomal RNA maturation and  
341 modulating atherogenic molecular networks (53). The regional chr9p21 GWAS signal has also been  
342 associated with T2D, but this association is not mediated by *ANRIL*, as the association signal for T2D is  
343 separated from that for atherosclerosis by a recombination hot spot that renders the two disease  
344 association signals in linkage equilibrium (54). Human pancreatic islets transcribe thousands of  
345 lncRNAs, many of which are highly islet- or beta cell-specific (25), including two beta cell lncRNAs  
346 shown to cis-regulate nearby genes involved in T2D physiology. Loss-of-function screening in a human  
347 islet beta cell line identified the lncRNA *PLUTO* (*PDX1* locus upstream transcript) as a positive  
348 regulator of *PDX1*, a critical transcriptional regulator of human pancreas development and beta cell  
349 function (45). *PLUTO* appears to cis-regulate *PDX1* by altering chromatin structure to facilitate contact  
350 between the *PDX1* promoter and its enhancer cluster. Another islet-specific transcript, *blinc1*, has been  
351 shown to regulate the expression of groups of functionally related genes, including *NKX2-2*, an essential  
352 transcription factor important for beta cell developmental programs (46).

353  
354 Integrating these observations with prior evidence, we envision the following physiological model for  
355 the action of *LOC157273* on T2D hepatic physiology (**Supplementary Figure S9**). Our siRNA data  
356 suggest that *LOC157273* is a functional suppressor of *PPP1R3B* transcription, with lower lncRNA  
357 levels associated with higher hepatocyte *PPP1R3B* expression. *PPP1R3B* is the glycogen-targeting  
358 subunit of phosphatase PP1, regulating PP1 activity by suppressing the rate at which PP1 inactivates  
359 glycogen phosphorylase (decreasing glycogen breakdown) and enhancing the rate at which it activates  
360 glycogen synthase and increases glycogen synthesis (55). Increased liver *PPP1R3B* expression therefore  
361 shifts basal and insulin-stimulated hepatic glycogen flux towards storage (16), which is consistent with  
362 our *in vitro* data as well as human liver imaging studies showing that the rs4841132-A allele carriers  
363 have increased hepatic attenuation on CT imaging, suggestive of increased glycogen storage (15, 56).  
364 Assuming that rs4841132-A allele carriers have increased glycogen stores, we hypothesize that these  
365 will lead to reduced glucose-uptake by the liver in the fasting state, consistent with observed GWAS  
366 associations with elevated fasting serum glucose and insulin levels and T2D risk (4). Additionally,  
367 abundant liver glycogen in the fasting state may be easily mobilized to glucose-6-phosphate and  
368 therefore increase glycolytic flux, consistent with observed associations with increased lactate levels in  
369 humans (57). Liver free fatty acid formation is also influenced, consistent with observed decreases in  
370 cholesterol levels (58). In contrast to the fasting state, in the postprandial state, the rs4841132-A allele  
371 appears to cause increased insulin-mediated glucose-uptake by the liver (16). With liver glycogen  
372 synthesis increased, hepatic glucose uptake may increase, consistent with observed associations for  
373 SNPs near *PPP1R3B* with decreased 2-hour post OGTT glucose levels seen in our earlier GWAS (4).  
374

375 Strengths of our study include a clear test of the hypothesis that *LOC157273*, in which the well-  
376 documented metabolic trait variant rs4841132 resides, regulates the nearby gene *PPP1R3B* and  
377 influences hepatocyte glycogen deposition, supporting the contention that the lncRNA is the causal  
378 transcript at the chr8p23.1 GWAS locus. That we demonstrated this in humans is important, as  
379 *LOC157273* does not have an orthologue in rodents and can't be meaningfully studied in them.  
380 Limitations include that we studied allelic imbalance in only one rs4841132 A/G heterozygote  
381 hepatocyte donor, but effects in this individual were similar to lipid and glycogen hepatic storage effects  
382 seen in much larger samples with A/G carriers. Unbiased RNA-seq following siRNA knockdown of  
383 *LOC157273* identified many additional transcripts that could contribute to the observed increase in  
384 hepatic glycogen deposition, but due to the small number of biological replicates available, full  
385 exploration of these signals will require future research. Finally, we do not yet know the exact molecular  
386 mechanism whereby *LOC157273* regulates *PPP1R3B* or any of the other transcripts seen by RNA-seq.  
387 LncRNAs have multiple mechanisms that influence gene regulation; here, we might postulate epigenetic  
388 and/or cytoplasmic mechanisms to explain both its cytoplasmic location and apparently broad  
389 transcriptional effects (59).

390  
391 Causal transcripts, relevant tissues and molecular mechanisms underlying the hundreds of T2D-  
392 associated genomic loci are now coming to light. A goal of modern chronic disease genomics is to  
393 identify new mechanisms for therapeutic targeting. RNA therapeutics is one novel frontier for genomic  
394 medicine. Small-interfering (si) RNA therapeutics, which as in our approach loads its target RNA into  
395 the endogenous cytoplasmic RNA-induced silencing complex (RISC), are now in late-stage clinical  
396 trials for lipid-lowering through PCSK9 inhibition (60). The liver is especially amenable to RNA  
397 therapeutics; glycemic control via siRNA regulation of glycogen entry into the liver arises as a  
398 tantalizing possibility. However, the mild glycogenosis that appears to accompany genetic variation at  
399 rs4841132 raises the possibility that lowering blood glucose by increasing hepatic storage of glycogen  
400 may have its own risks (30). While our data support a genetic regulatory relationship between  
401 *LOC157273* and *PPP1R3B*, *LOC157273* appears to regulate many other transcripts whose action in  
402 regulating hepatic glycogen and cholesterol flux remain to be explained. Nonetheless, we have identified  
403 a lncRNA to be the causal transcript at a hepatic T2D-cardiometabolic disease GWAS locus, opening  
404 the window to the possibility of new, RNA-based therapeutic pathways for therapy and prevention of  
405 T2D.

406

#### 407 **Acknowledgements**

408 Funding: AKM was supported by K01 DK107836. RS supported by U01 DK078616. JBM supported by  
409 R01 DK078616, U01 DK078616, K24 DK080140, and an American Diabetes Association Mentored  
410 Scientist Career Development Award. LL supported by the NIH Director's New Innovator Award 1DP2-  
411 CA196375, and by the Wayne State University 2018-2019 Charles H. Gershenson Distinguished Faculty  
412 Fellowship. MG supported by the Eris M. Field Chair in Diabetes Research. JR: supported in part by  
413 R01 DK078616, the National Center for Advancing Translational Sciences, CTSI grant ULTR001881,  
414 and the National Institute of Diabetes and Digestive and Kidney Disease Diabetes Research Center  
415 (DRC) grant DK063491 to the Southern California Diabetes Endocrinology Research Center. MG and  
416 JR supported by Diabetes Research Center grant P30 DK063491 and National Center for Advancing  
417 Translational Sciences (NCATS) Grant UL1TR001881

418

419 JBM is the guarantor of this work and, as such, had full access to all the data in the study and takes  
420 responsibility for the integrity of the data and the accuracy of the data analysis.

421

#### 422 **Author Contributions**

423 Led the study: JM, LL; Writing initial draft and submitted final draft of paper: AM, AG, EK, RS, JM,  
424 LL; Interpreted data, provided intellectual input, reviewed drafts of the paper and approved the final  
425 version: All; Conducted laboratory experiments: AG, PT, JC, JD; Conducted statistical analysis and  
426 bioinformatics: AM, EK, JB; Provided funding and material support: JM, LL  
427 **The authors declare no conflict of interest.**

428 **References**

- 429 1. Narayan KM, Boyle JP, Geiss LS, Saaddine JB, Thompson TJ. Impact of recent increase in  
430 incidence on future diabetes burden: U.S., 2005-2050. *Diabetes care*. 2006;29(9):2114-6.
- 431 2. Knowler WC, Pettitt DJ, Savage PJ, Bennett PH. Diabetes incidence in Pima indians: contributions  
432 of obesity and parental diabetes. *Am J Epidemiol*. 1981;113(2):144-56.
- 433 3. Cauchi S, Nead KT, Choquet H, Horber F, Potoczna N, Balkau B, et al. The genetic susceptibility  
434 to type 2 diabetes may be modulated by obesity status: implications for association studies. *BMC*  
435 *Med Genet*. 2008;9:45.
- 436 4. Manning AK, Hivert MF, Scott RA, Grimsby JL, Bouatia-Naji N, Chen H, et al. A genome-wide  
437 approach accounting for body mass index identifies genetic variants influencing fasting glycemic  
438 traits and insulin resistance. *Nature genetics*. 2012;44(6):659-69.
- 439 5. Wessel J, Chu AY, Willems SM, Wang S, Yaghootkar H, Brody JA, et al. Low-frequency and rare  
440 exome chip variants associate with fasting glucose and type 2 diabetes susceptibility. *Nat Commun*.  
441 2015;6:5897.
- 442 6. Fuchsberger C, Flannick J, Teslovich TM, Mahajan A, Agarwala V, Gaulton KJ, et al. The genetic  
443 architecture of type 2 diabetes. *Nature*. 2016;536(7614):41-7.
- 444 7. Mahajan A, Wessel J, Willems SM, Zhao W, Robertson NR, Chu AY, et al. Refining the accuracy  
445 of validated target identification through coding variant fine-mapping in type 2 diabetes. *Nature*  
446 *genetics*. 2018;50(4):559-71.
- 447 8. Mahajan A, Taliun D, Thurner M, Robertson NR, Torres JM, Rayner NW, et al. Fine-mapping type  
448 2 diabetes loci to single-variant resolution using high-density imputation and islet-specific  
449 epigenome maps. *Nature genetics*. 2018;50(11):1505-13.
- 450 9. Hayes MG, Urbanek M, Hivert MF, Armstrong LL, Morrison J, Guo C, et al. Identification of  
451 HKDC1 and BACE2 as genes influencing glycemic traits during pregnancy through genome-wide  
452 association studies. *Diabetes*. 2013;62(9):3282-91.
- 453 10. Inouye M, Ripatti S, Kettunen J, Lyytikainen LP, Oksala N, Laurila PP, et al. Novel Loci for  
454 metabolic networks and multi-tissue expression studies reveal genes for atherosclerosis. *PLoS*  
455 *Genet*. 2012;8(8):e1002907.
- 456 11. Willer CJ, Schmidt EM, Sengupta S, Peloso GM, Gustafsson S, Kanoni S, et al. Discovery and  
457 refinement of loci associated with lipid levels. *Nature genetics*. 2013;45(11):1274-83.
- 458 12. Ligthart S, de Vries PS, Uitterlinden AG, Hofman A, Franco OH, Chasman DI, et al. Pleiotropy  
459 among common genetic loci identified for cardiometabolic disorders and C-reactive protein. *PLoS*  
460 *One*. 2015;10(3):e0118859.
- 461 13. Lettre G, Palmer CD, Young T, Ejebe KG, Allayee H, Benjamin EJ, et al. Genome-wide  
462 association study of coronary heart disease and its risk factors in 8,090 African Americans: the  
463 NHLBI CARE Project. *PLoS genetics*. 2011;7(2):e1001300.
- 464 14. Raffield LM, Louie T, Sofer T, Jain D, Ipp E, Taylor KD, et al. Genome-wide association study of  
465 iron traits and relation to diabetes in the Hispanic Community Health Study/Study of Latinos  
466 (HCHS/SOL): potential genomic intersection of iron and glucose regulation? *Hum Mol Genet*.  
467 2017;26(10):1966-78.
- 468 15. Speliotes EK, Yerges-Armstrong LM, Wu J, Hernaez R, Kim LJ, Palmer CD, et al. Genome-wide  
469 association analysis identifies variants associated with nonalcoholic fatty liver disease that have  
470 distinct effects on metabolic traits. *PLoS Genet*. 2011;7(3):e1001324.
- 471 16. Gasa R, Jensen PB, Berman HK, Brady MJ, DePaoli-Roach AA, Newgard CB. Distinctive  
472 regulatory and metabolic properties of glycogen-targeting subunits of protein phosphatase-1 (PTG,  
473 GL, GM/RG1) expressed in hepatocytes. *The Journal of biological chemistry*. 2000;275(34):26396-  
474 403.

- 475 17. Gasa R, Clark C, Yang R, DePaoli-Roach AA, Newgard CB. Reversal of diet-induced glucose  
476 intolerance by hepatic expression of a variant glycogen-targeting subunit of protein phosphatase-1.  
477 *The Journal of biological chemistry*. 2002;277(2):1524-30.
- 478 18. Newgard CB, Brady MJ, O'Doherty RM, Saltiel AR. Organizing glucose disposal: emerging roles  
479 of the glycogen targeting subunits of protein phosphatase-1. *Diabetes*. 2000;49(12):1967-77.
- 480 19. Agius L. Role of glycogen phosphorylase in liver glycogen metabolism. *Mol Aspects Med*.  
481 2015;46:34-45.
- 482 20. Cohen P. The twentieth century struggle to decipher insulin signalling. *Nature reviews Molecular  
483 cell biology*. 2006;7(11):867-73.
- 484 21. Liu CT, Raghavan S, Maruthur N, Kabagambe EK, Hong J, Ng MC, et al. Trans-ethnic Meta-  
485 analysis and Functional Annotation Illuminates the Genetic Architecture of Fasting Glucose and  
486 Insulin. *American journal of human genetics*. 2016;99(1):56-75.
- 487 22. Ishii N, Ozaki K, Sato H, Mizuno H, Saito S, Takahashi A, et al. Identification of a novel non-  
488 coding RNA, MIAT, that confers risk of myocardial infarction. *J Hum Genet*. 2006;51(12):1087-  
489 99.
- 490 23. Tajbakhsh A, Khorrami MS, Hassanian SM, Aghasizade M, Pasdar A, Maftouh M, et al. The 9p21  
491 Locus and its Potential Role in Atherosclerosis Susceptibility; Molecular Mechanisms and Clinical  
492 Implications. *Curr Pharm Des*. 2016;22(37):5730-7.
- 493 24. Mitchel K, Theusch E, Cubitt C, Dose AC, Stevens K, Naidoo D, et al. RP1-13D10.2 Is a Novel  
494 Modulator of Statin-Induced Changes in Cholesterol. *Circ Cardiovasc Genet*. 2016;9(3):223-30.
- 495 25. Moran I, Akerman I, van de Bunt M, Xie R, Benazra M, Nammo T, et al. Human beta cell  
496 transcriptome analysis uncovers lncRNAs that are tissue-specific, dynamically regulated, and  
497 abnormally expressed in type 2 diabetes. *Cell metabolism*. 2012;16(4):435-48.
- 498 26. Katayama S, Tomaru Y, Kasukawa T, Waki K, Nakanishi M, Nakamura M, et al. Antisense  
499 transcription in the mammalian transcriptome. *Science*. 2005;309(5740):1564-6.
- 500 27. Engstrom PG, Suzuki H, Ninomiya N, Akalin A, Sessa L, Lavorgna G, et al. Complex Loci in  
501 human and mouse genomes. *PLoS Genet*. 2006;2(4):e47.
- 502 28. Orom UA, Derrien T, Beringer M, Gumireddy K, Gardini A, Bussotti G, et al. Long noncoding  
503 RNAs with enhancer-like function in human cells. *Cell*. 2010;143(1):46-58.
- 504 29. Dongiovanni P, Meroni M, Mancina RM, Baselli G, Rametta R, Pelusi S, et al. Protein phosphatase  
505 1 regulatory subunit 3B gene variation protects against hepatic fat accumulation and fibrosis in  
506 individuals at high risk of nonalcoholic fatty liver disease. *Hepatol Commun*. 2018;2(6):666-75.
- 507 30. Stender S, Smagris E, Lauridsen BK, Kofoed KF, Nordestgaard BG, Tybjaerg-Hansen A, et al.  
508 Relationship between genetic variation at PPP1R3B and levels of liver glycogen and triglyceride.  
509 *Hepatology*. 2018;67(6):2182-95.
- 510 31. Consortium GT. Human genomics. The Genotype-Tissue Expression (GTEx) pilot analysis:  
511 multitissue gene regulation in humans. *Science*. 2015;348(6235):648-60.
- 512 32. Anders S, Huber W. Differential expression analysis for sequence count data. *Genome Biol*.  
513 2010;11(10):R106.
- 514 33. McCarthy DJ, Chen Y, Smyth GK. Differential expression analysis of multifactor RNA-Seq  
515 experiments with respect to biological variation. *Nucleic Acids Res*. 2012;40(10):4288-97.
- 516 34. Wu H, Wang C, Wu Z. A new shrinkage estimator for dispersion improves differential expression  
517 detection in RNA-seq data. *Biostatistics*. 2013;14(2):232-43.
- 518 35. Yu G, He QY. ReactomePA: an R/Bioconductor package for reactome pathway analysis and  
519 visualization. *Mol Biosyst*. 2016;12(2):477-9.
- 520 36. Gómez-Lechón MJ, Ponsoda X, Castell JV. A microassay for measuring glycogen in 96-well-  
521 cultured cells. *Anal Biochem*. 1996;236(2):296-301.
- 522 37. Block GD, Locker J, Bowen WC, Petersen BE, Katyal S, Strom SC, et al. Population expansion,  
523 clonal growth, and specific differentiation patterns in primary cultures of hepatocytes induced by

- 524 HGF/SF, EGF and TGF alpha in a chemically defined (HGM) medium. *J Cell Biol.*  
525 1996;132(6):1133-49.
- 526 38. Forrest AR, Kawaji H, Rehli M, Baillie JK, de Hoon MJ, Haberle V, et al. A promoter-level  
527 mammalian expression atlas. *Nature.* 2014;507(7493):462-70.
- 528 39. Wood EJ, Chin-Inmanu K, Jia H, Lipovich L. Sense-antisense gene pairs: sequence, transcription,  
529 and structure are not conserved between human and mouse. *Front Genet.* 2013;4:183.
- 530 40. Pasquali L, Gaulton KJ, Rodriguez-Segui SA, Mularoni L, Miguel-Escalada I, Akerman I, et al.  
531 Pancreatic islet enhancer clusters enriched in type 2 diabetes risk-associated variants. *Nature*  
532 *genetics.* 2014;46(2):136-43.
- 533 41. van de Bunt M, Manning Fox JE, Dai X, Barrett A, Grey C, Li L, et al. Transcript Expression Data  
534 from Human Islets Links Regulatory Signals from Genome-Wide Association Studies for Type 2  
535 Diabetes and Glycemic Traits to Their Downstream Effectors. *PLoS genetics.*  
536 2015;11(12):e1005694.
- 537 42. Varshney A, Scott LJ, Welch RP, Erdos MR, Chines PS, Narisu N, et al. Genetic regulatory  
538 signatures underlying islet gene expression and type 2 diabetes. *Proceedings of the National*  
539 *Academy of Sciences of the United States of America.* 2017;114(9):2301-6.
- 540 43. Roman TS, Cannon ME, Vadlamudi S, Buchkovich ML, Wolford BN, Welch RP, et al. A Type 2  
541 Diabetes-Associated Functional Regulatory Variant in a Pancreatic Islet Enhancer at the ADCY5  
542 Locus. *Diabetes.* 2017;66(9):2521-30.
- 543 44. Kycia I, Wolford BN, Huyghe JR, Fuchsberger C, Vadlamudi S, Kursawe R, et al. A Common  
544 Type 2 Diabetes Risk Variant Potentiates Activity of an Evolutionarily Conserved Islet Stretch  
545 Enhancer and Increases C2CD4A and C2CD4B Expression. *American journal of human genetics.*  
546 2018;102(4):620-35.
- 547 45. Akerman I, Tu Z, Beucher A, Rolando DMY, Sauty-Colace C, Benazra M, et al. Human Pancreatic  
548 beta Cell lncRNAs Control Cell-Specific Regulatory Networks. *Cell metabolism.* 2017;25(2):400-  
549 11.
- 550 46. Arnes L, Akerman I, Balderes DA, Ferrer J, Sussel L. *betalinc1* encodes a long noncoding RNA  
551 that regulates islet beta-cell formation and function. *Genes Dev.* 2016;30(5):502-7.
- 552 47. Pan DZ, Garske KM, Alvarez M, Bhagat YV, Boocock J, Nikkola E, et al. Integration of human  
553 adipocyte chromosomal interactions with adipose gene expression prioritizes obesity-related genes  
554 from GWAS. *Nat Commun.* 2018;9(1):1512.
- 555 48. Scott LJ, Erdos MR, Huyghe JR, Welch RP, Beck AT, Wolford BN, et al. The genetic regulatory  
556 signature of type 2 diabetes in human skeletal muscle. *Nat Commun.* 2016;7:11764.
- 557 49. Dunn JS, Mlynarski WM, Pezzolesi MG, Borowiec M, Powers C, Krolewski AS, et al.  
558 Examination of PPP1R3B as a candidate gene for the type 2 diabetes and MODY loci on  
559 chromosome 8p23. *Ann Hum Genet.* 2006;70(Pt 5):587-93.
- 560 50. Abdulkarim B, Nicolino M, Igoillo-Esteve M, Daures M, Romero S, Philippi A, et al. A Missense  
561 Mutation in PPP1R15B Causes a Syndrome Including Diabetes, Short Stature, and Microcephaly.  
562 *Diabetes.* 2015;64(11):3951-62.
- 563 51. Niazi RK, Sun J, Have CT, Hollensted M, Linneberg A, Pedersen O, et al. Increased frequency of  
564 rare missense PPP1R3B variants among Danish patients with type 2 diabetes. *PLoS One.*  
565 2019;14(1):e0210114.
- 566 52. Dechamethakun S, Muramatsu M. Long noncoding RNA variations in cardiometabolic diseases. *J*  
567 *Hum Genet.* 2017;62(1):97-104.
- 568 53. Holdt LM, Stahringer A, Sass K, Pichler G, Kulak NA, Wilfert W, et al. Circular non-coding RNA  
569 ANRIL modulates ribosomal RNA maturation and atherosclerosis in humans. *Nat Commun.*  
570 2016;7:12429.
- 571 54. Dauriz M, Meigs JB. Current Insights into the Joint Genetic Basis of Type 2 Diabetes and Coronary  
572 Heart Disease. *Current cardiovascular risk reports.* 2014;8(1):368.

- 573 55. Doherty MJ, Moorhead G, Morrice N, Cohen P, Cohen PT. Amino acid sequence and expression of  
574 the hepatic glycogen-binding (GL)-subunit of protein phosphatase-1. *FEBS Lett.* 1995;375(3):294-  
575 8.
- 576 56. Feitosa MF, Wojczynski MK, North KE, Zhang Q, Province MA, Carr JJ, et al. The ERLIN1-  
577 CHUK-CWF19L1 gene cluster influences liver fat deposition and hepatic inflammation in the  
578 NHLBI Family Heart Study. *Atherosclerosis.* 2013;228(1):175-80.
- 579 57. Tin A, Balakrishnan P, Beaty TH, Boerwinkle E, Hoogeveen RC, Young JH, et al. GCKR and  
580 PPP1R3B identified as genome-wide significant loci for plasma lactate: the Atherosclerosis Risk in  
581 Communities (ARIC) study. *Diabet Med.* 2016;33(7):968-75.
- 582 58. Teslovich TM, Musunuru K, Smith AV, Edmondson AC, Stylianou IM, Koseki M, et al.  
583 Biological, clinical and population relevance of 95 loci for blood lipids. *Nature.*  
584 2010;466(7307):707-13.
- 585 59. Font-Cunill B, Arnes L, Ferrer J, Sussel L, Beucher A. Long Non-coding RNAs as Local  
586 Regulators of Pancreatic Islet Transcription Factor Genes. *Front Genet.* 2018;9:524.
- 587 60. Levin AA. Treating Disease at the RNA Level with Oligonucleotides. *N Engl J Med.*  
588 2019;380(1):57-70.  
589  
590

591 **Table 1: Difference in CT ( $\Delta$ CT) for target gene and *GAPDH* reference gene from qRT-PCR on**  
 592 **RNA purified from primary human hepatocytes derived from four homozygous (G/G) donors and**  
 593 **one heterozygous (A/G) donor**  
 594

| Donor                                | Replicates | Genotype | $\Delta$ CT for LOC157273<br>Mean (Min–Max; SD) | $\Delta$ CT for General-<br>PPP1R3B<br>Mean (Min–Max; SD) | $\Delta$ CT for Hepatocyte-<br>specificPPP1R3B<br>Mean (Min–Max; SD) |
|--------------------------------------|------------|----------|-------------------------------------------------|-----------------------------------------------------------|----------------------------------------------------------------------|
| Hu8200A*                             | 4          | G/G      | 8.7 (5.1 – 11.5; 2.7)                           | 8.0 (7.1 – 8.7; 0.8)                                      | 9.0 (8.0 – 10.0; 1.0)                                                |
| TRL4056B                             | 3          | G/G      | 9.5 (8.8 – 9.8; 0.6)                            | 6.8 (5.2 – 7.6; 1.4)                                      | 4.5 (3.8 – 5.0; 0.6)                                                 |
| TRL4105A                             | 4          | G/G      | 8.5 (8.0 – 9.2; 0.6)                            | 7.6 (5.9 – 9.3; 1.8)                                      | 7.6 (5.6 – 9.0; 1.6)                                                 |
| TRL4108                              | 3          | G/G      | 8.7 (7.8 – 9.3; 0.8)                            | 7.3 (6.0 – 7.9; 1.1)                                      | 7.2 (6.5 – 7.8; 0.7)                                                 |
| <b>Meta-Analysis of 4 G/G donors</b> |            |          | <b>8.94 (SD: 0.131)</b>                         | <b>7.52 (SD: 0.311)</b>                                   | <b>6.39 (SD: 0.153)</b>                                              |
| TRL4079                              | 4          | A/G      | 11.0 (10.2 – 12.4; 0.9)                         | 7.7 (5.1 – 10.2; 2.9)                                     | 6.9 (5.5 – 8.4; 1.5)                                                 |

595  
 596 **Footnote:** The cDNA was used as input to 20  $\mu$ L TaqMan reactions with one of four primer sets shown  
 597 in **Supplementary Table 3** — *LOC157273* lncRNA, the hepatocyte-specific isoform 1 of *PPP1R3B*  
 598 mRNA, the general isoform 2 of *PPP1R3B* mRNA, and *GAPDH* mRNA (a housekeeping gene).  
 599 *GAPDH* was used for normalization and the *LOC157273* and *PPP1R3B* results were expressed as  $\Delta$ C<sub>T</sub>.  
 600 *LOC157273* shows a 76% relative decreased expression in the A/G donor compared to the averaged  
 601 expression levels in the G/G donors. \* Hepatocyte donor used in siRNA knockdown experiments  
 602  
 603



604 **Figures**

605  
606 **Figure 1: Human hepatocytes stained using Stellaris RNA FISH show that lncRNA *LOC157273***  
607 **localizes to distinct punctate foci in the cytoplasm.** The red staining (63x oil, 500 ms, 568 nm) in  
608 human hepatocytes with rs4841132 G/G genotype (**Panels A and B**) or with rs4841132 A/G genotype  
609 (**Panel C**) shows cytoplasmic punctate foci containing *LOC157273*, a pattern consistent with the  
610 possible localization of this lncRNA in cytoplasmic riboprotein (protein-RNA) complexes. Blue staining  
611 indicates hepatocyte nuclei.

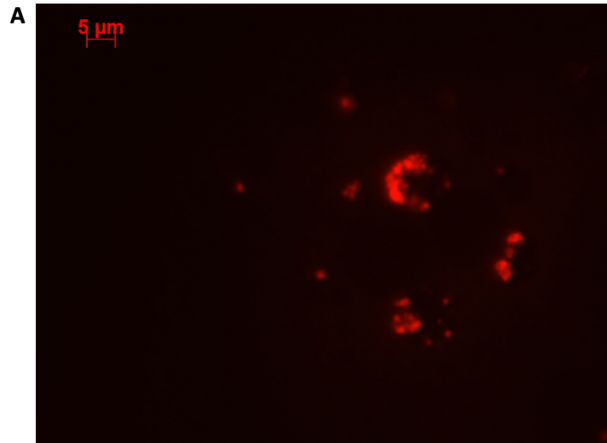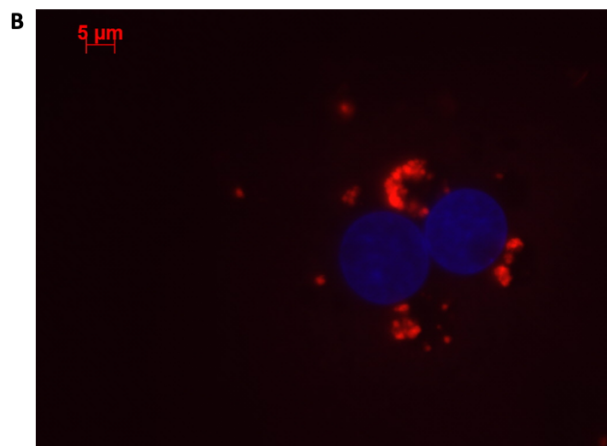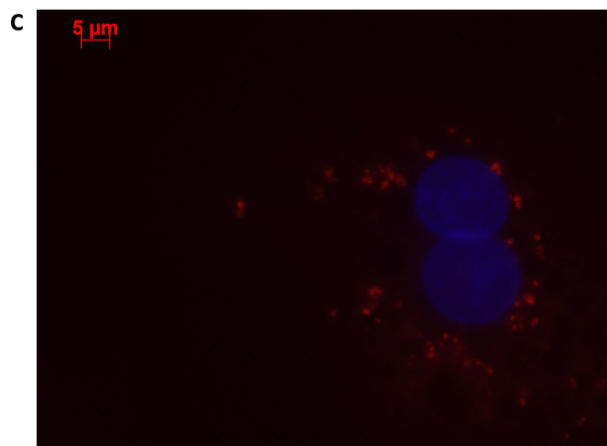

612

613 **Figure 2: siRNA knockdown of *LOC157273* in human hepatocytes with rs4841132 G/G genotype**  
614 **reduces *LOC157273* lncRNA levels and increases both *PPP1R3B* mRNA levels and glycogen**  
615 **deposition. Panel A** shows a UCSC Genome Browser view of the genomic position on chromosome 8  
616 (hg19) of *LOC157273* (sense) and four siRNA constructs (antisense). siRNA-11 and siRNA-15, the  
617 most efficient constructs, targeted exons 1 and 2 of the lncRNA. **Panel B** shows expression fold-change  
618 of *LOC157273* mRNA and **Panel C**, *PPP1R3B* mRNA, after knockdown with siRNA11, siRNA15 and  
619 control. Error bars represent standard errors of normalized Taqman qRT-PCR expression normalized  
620 and averaged over 3 biological replicates. **Panel D** shows human hepatocyte glycogen content (6  
621 replicates per condition) after knockdown with siRNA11, siRNA15 and control in one biological  
622 replicate.

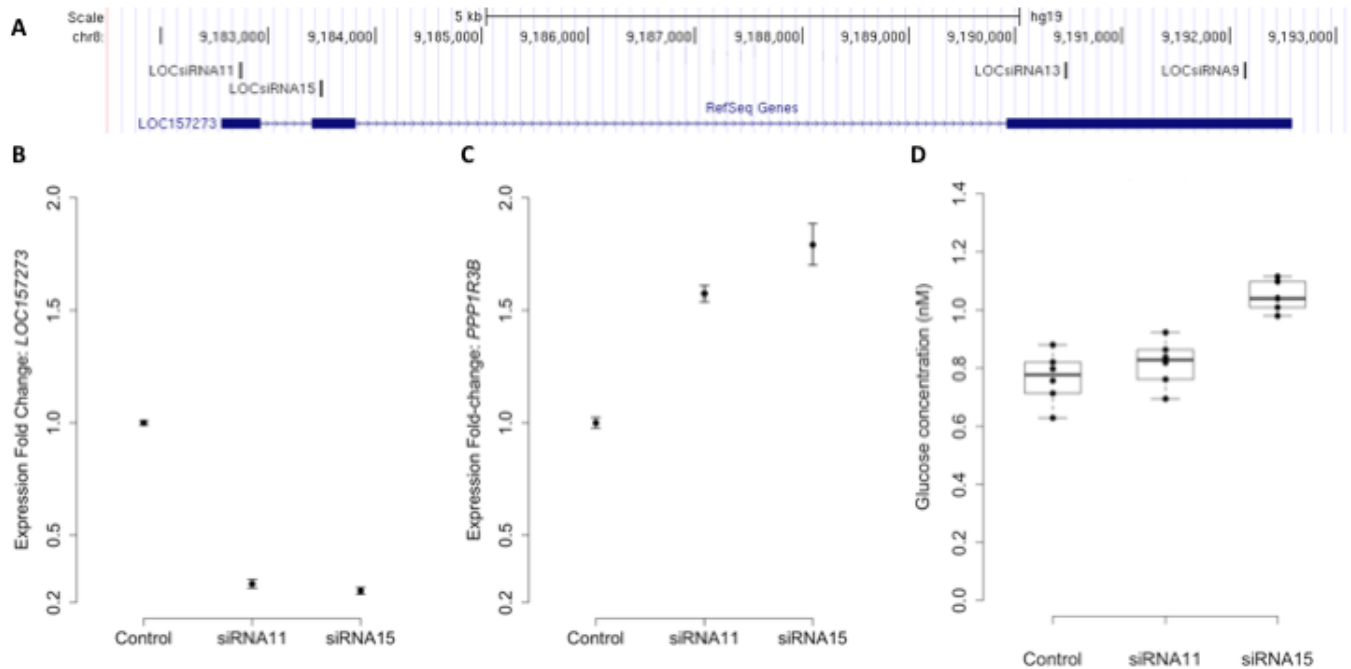

623  
624

625 **Figure 3: siRNA knockdown of *LOC157273* using transcriptome-wide differential expression**  
 626 **analysis in rs4841132 G/G genotype human hepatocytes results in significant expression changes**  
 627 **in hundreds of transcripts, including *LOC157273*, *PPP1R3B* and numerous putative *trans* targets.**  
 628 **Panel A.** Volcano plot showing the fold-change effect of siRNA-11 and siRNA-15 knockdowns  
 629 combined (X axis), compared with controls, with gray points indicating significant change in transcript  
 630 expression (family-wise  $P_{adj} < 0.05$ ) (Y axis). The white square point indicates the *LOC157273*  
 631 transcript and shows that its knockdown reduced its expression (fold change = 0.74,  $P = 0.004$ ,  $P_{adj} =$   
 632 0.04), as expected for a successful knockdown experiment. The white diamond point indicates the  
 633 *PPP1R3B* transcript and shows that *LOC157273* knockdown increased *PPP1R3B* expression 34% (fold  
 634 change = 1.34,  $P = 4.5 \times 10^{-5}$ ,  $P_{adj} = 0.001$ ). **Panel B.** Reactome enrichment analysis of genes with  
 635 increased expression after siRNA-11 or siRNA-15 knockdown compared to controls (221 dark gray  
 636 points in Panel A; Fold Change > 1.34 and  $P_{adj} < 0.001$ ). Each row represents a significant Reactome  
 637 pathway (family-wise  $P < 0.05$ ) with GeneRatio (X axis) showing the degree to which the differentially  
 638 expressed genes were enriched in the pathway. The count of differentially expressed genes within each  
 639 pathway is depicted with the size of the circles, and the significance of the enrichment is depicted with  
 640 the color of the circles.  
 641

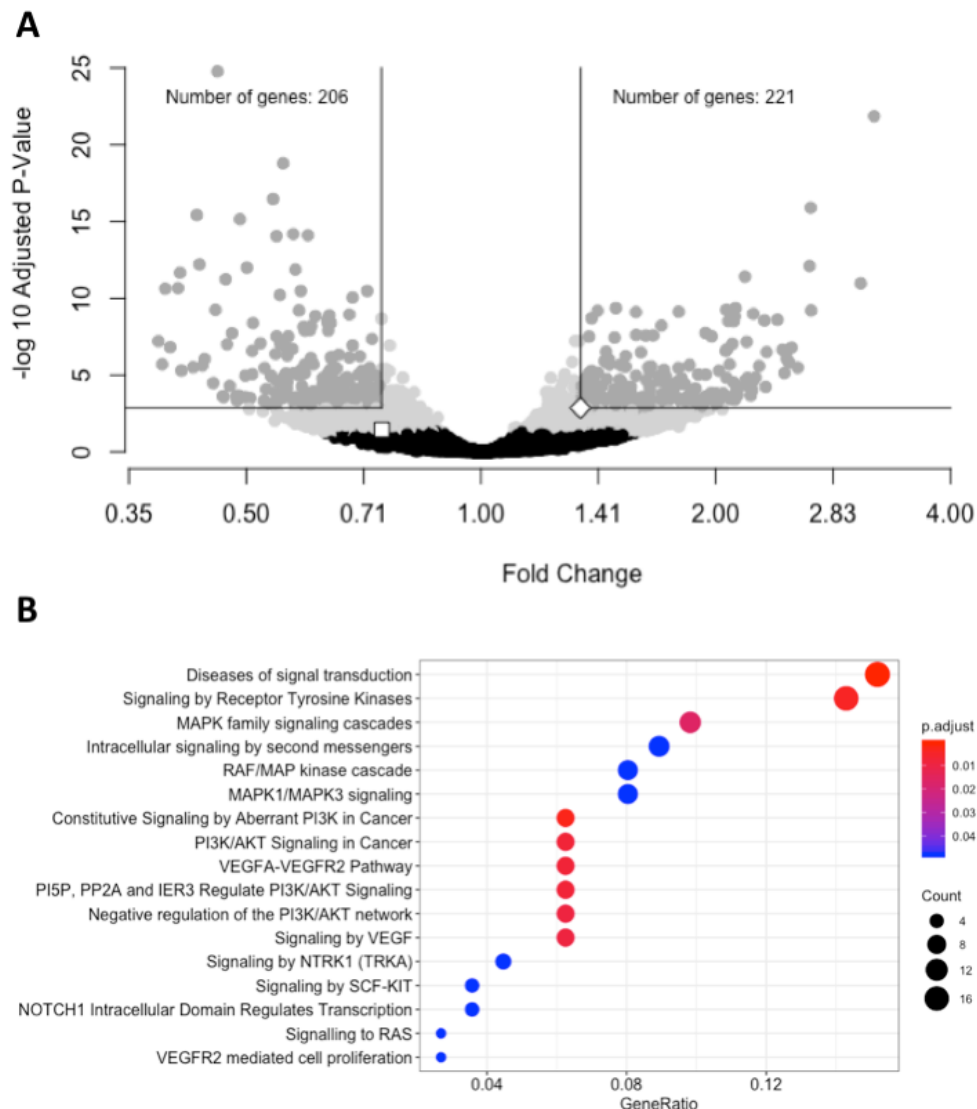

643 **Figure 4: Glycogen deposition response after insulin re-stimulation of primary human hepatocytes**  
644 **Panel A** shows a donor with rs4841132 G/G genotype and **Panels B and C** show replicates of a donor  
645 with rs4841132 A/G genotype. Brief (15 or 30 min) treatment with 5 nM glucagon demonstrates a  
646 decrease in glycogen compared to the control, confirming that what is being measured is glycogen.  
647

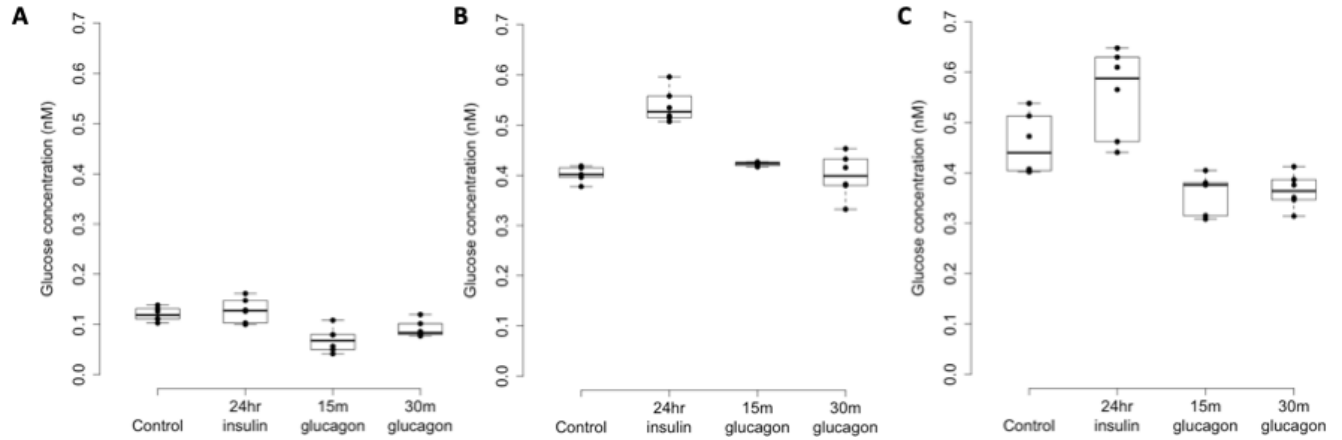

648

649 **Figure 5: Analysis of *LOC157273* transcription in primary hepatocytes from a heterozygous**  
 650 **rs4841132 A/G donor demonstrates decreased transcription of the minor (A) allele. Panel A.** RNA  
 651 was transcribed into cDNA using a gene-specific strand-specific primer for two replicates. **Panel B.**  
 652 Aliquots of cDNA were amplified with PCR primers seated in the first exon (black, X1F) and allele-  
 653 specific primers that recognize only the major allele (magenta, 32G or 33G) or minor allele (green, 32A  
 654 or 33A). The X1F-32 reaction yields a PCR product of 231 bp, while the X1F-33 reaction yields a PCR  
 655 product of 302 bp. **Panel C.** Image-based quantification of the X1F-32 and X1F-33 bands from the  
 656 minor allele compared to the major allele using the ImageJ software. Total intensity: sum of  
 657 32GR/33GR or 33AR/32AR lanes. Relative Intensity: quantification of the rs4841132-A minor allele  
 658 intensity compared to the rs4841132-G major allele intensity.

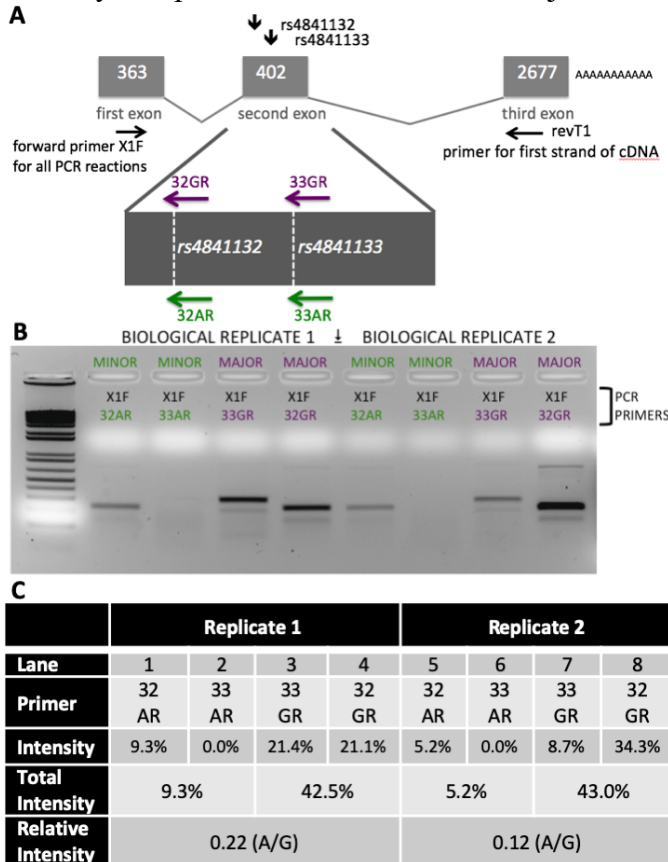

659
